# Supplementary material for: Patients’ Stem Cells Differentiation in a 3D Environment as a Promising Experimental Tool for the Study of Amyotrophic Lateral Sclerosis
Source: MDPI journal article supplement (doi:10.3390/ijms23105344), 2022-05-11
Supplement: s1 [file s1]

Table S1: Mass swelling ratio of printed structures

| <b>Type of construct</b>              | <b>Mass swelling ratio</b> |
|---------------------------------------|----------------------------|
| Cellink Bioink T-0h                   | 1.10                       |
| Cellink Bioink + Culture Medium T-0h  | 1.02                       |
| Cellink Bioink T-1h                   | 1.19                       |
| Cellink Bioink + Culture Medium T-1h  | 1.65                       |
| Cellink Bioink T-3h                   | 1.44                       |
| Cellink Bioink + Culture Medium T-3h  | 1.58                       |
| Cellink Bioink T-24h                  | 1.40                       |
| Cellink Bioink + Culture Medium T-24h | 1.55                       |
