# Supplementary material for: Patients’ Stem Cells Differentiation in a 3D Environment as a Promising Experimental Tool for the Study of Amyotrophic Lateral Sclerosis
Source: Int J Mol Sci. 2022 May 11;23(10):5344. doi: 10.3390/ijms23105344 (PMC9141644; doi:10.3390/ijms23105344)
Supplement: Supplementary file 1 [file ijms-23-05344-s001.zip]

Archive with 11 entries (11 files):
- Caption of Supplementary Materials.pdf
- Supplementary Figures.pdf
- Supplementary Table S1.pdf
- Supplementary video S1.mp4
- Supplementary video S2.mp4
- Supplementary video S3.mp4
- Supplementary video S4.mp4
- Supplementary video S5.mp4
- Supplementary video S6.mp4
- Supplementary video S7.mp4
- Supplementary video S8.mp4
